# Supplementary material for: Factors associated with the public’s trust in physicians in the context of the Lebanese healthcare system: a qualitative study
Source: PubMed Central journal article supplement (PMC6660947; doi:10.1186/s12913-019-4354-0), 2019-07-27
Supplement: 12913_2019_4354_MOESM1_ESM.pdf [file 12913_2019_4354_MOESM1_ESM.pdf]

Data collection sheet

Interviewer: -----

Interview date:-----

Recruited from:  Public place (e.g., Super market, Mini-market)

Co-investigator neighborhood

Language of interview:

Arabic

English

1- Sex:

Male

Female

2- Age:

18-30

31-40

41-50

51-60

>60

3- Level of education:  No education

School

High School

Undergraduate Studies

Masters/PHD

4- Area of residency:  Beirut

North

South

Nabatiye

Bekaa

Mount Lebanon

5- Have been seen by a doctor over the last 4 weeks:

Yes

No
