# Supplementary material for: Factors associated with the public’s trust in physicians in the context of the Lebanese healthcare system: a qualitative study
Source: PubMed Central journal article supplement (PMC6660947; doi:10.1186/s12913-019-4354-0), 2019-07-27
Supplement: 12913_2019_4354_MOESM2_ESM.pdf [file 12913_2019_4354_MOESM2_ESM.pdf]

## Interview guide

- Can you tell me a little about your experience with doctors?
- Do you feel that people in Lebanon trust physicians in Lebanon?
- Do you personally trust physicians in Lebanon?
- Which factors do you feel positively impact your trust in your doctor?
- Which factors do you feel negatively impact your trust in your doctor?
- What are ways that could improve your trust in your physicians?
